# Supplementary material for: Socioeconomic Position and Excessive Daytime Sleepiness
Source: Preprints.org preprint supplement (doi:10.20944/preprints202103.0484.v1), 2021-03-18
Supplement: Supplementary file 2 [file supplementary]

1. **Study :** global socioeconomic inequalities in excessive daytime sleepiness: a systematic review
2. **Syntax Pubmed:** ((((((((socioeconomic[Title/Abstract]) OR social status[Title/Abstract]) OR social position[Title/Abstract]) OR social class[Title/Abstract]) OR social rank[Title/Abstract]) OR education[Title/Abstract]) OR income[Title/Abstract]) OR occupation[Title/Abstract]) OR employment[Title/Abstract]) OR asset[Title/Abstract]) AND ((((((sleep[Title/Abstract]) OR sleepiness[Title/Abstract]) NOT (review [Publication Type])
3. **Results from PRISMA (performed the 29th May 2020): 6757**
